# Supplementary material for: Exosomal miR92a Promotes Cytarabine Resistance in Myelodysplastic Syndromes by Activating Wnt/β-catenin Signal Pathway
Source: MDPI journal article supplement (doi:10.3390/biom12101448), 2022-10-09
Supplement: s1 [file s1]

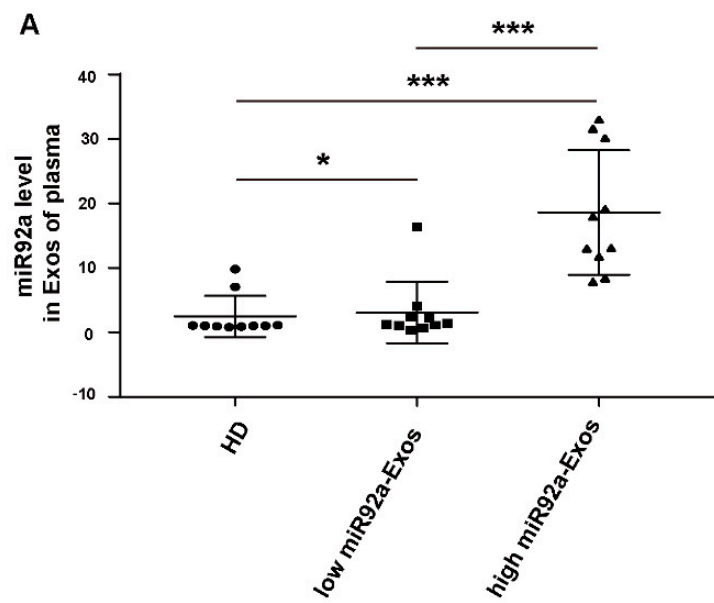

**Figure S1.** (A) miR92a level in Exos derived from plasma of HD (Exos-HD), MDS/AML patients (Exos-miR92a high and Exos-miR92a low).

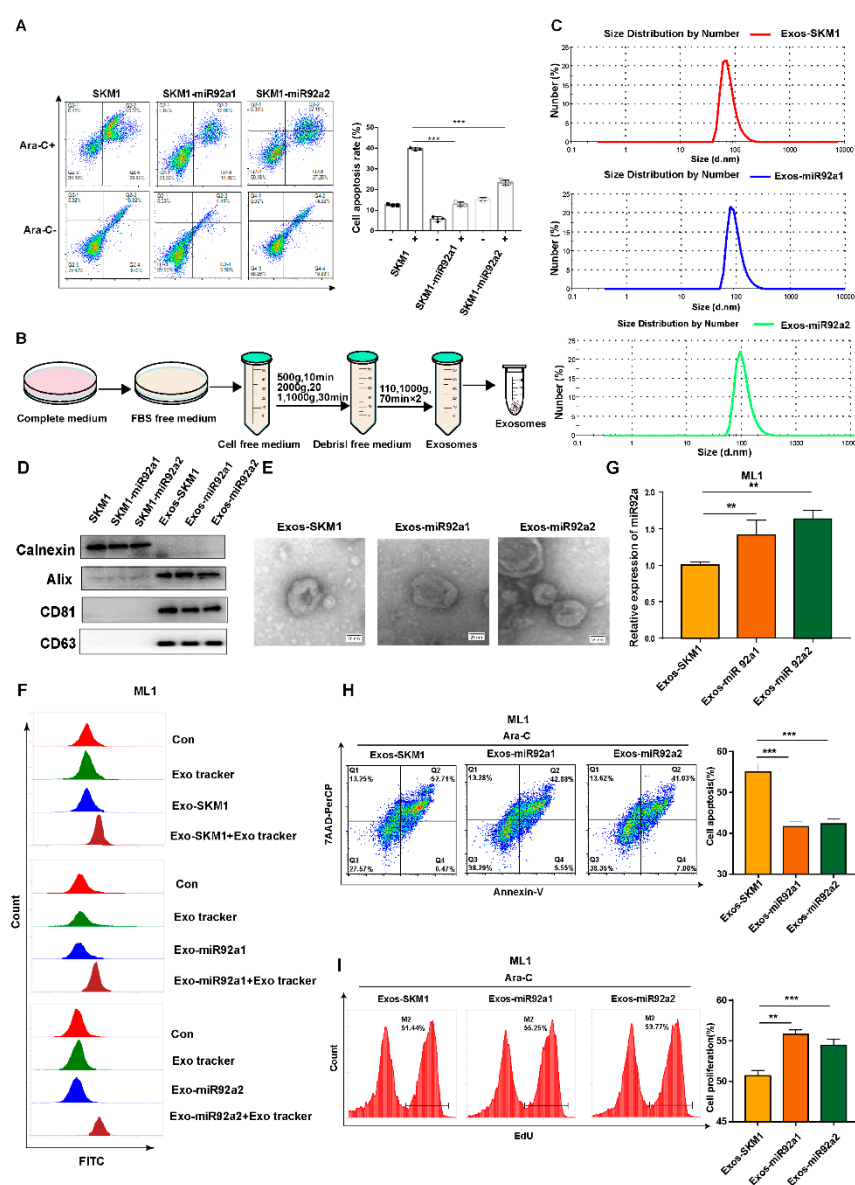

**Figure S2.** Exosomal miR92a increased resistance to Ara-C of ML1 cells. (A) Flow cytometry analysis of cell apoptosis of SKM1, SKM1-miR92a1 and SKM1-miR92a2 under 2  $\mu$ M Ara-C treatment for 48 h. (B) The scheme of exosome isolation from culture medium of SKM1, SKM1-miR92a1 and SKM1-miR92a2. (C) Particle size of Exos by NTA. (D) Detection of Exo markers by Western blotting. (E) Examination of Exo morphology by TEM. (F) Uptake of Exos-SKM1 and Exos-miR92a1/2 in SKM1 analyzed by flow cytometry. (G) miR92a level in ML1 treated with Exos-SKM1, Exos -miR92a1/2 for 48 h. (H-I) Flow cytometry analysis of cell apoptosis (H) and proliferation (I) of ML1 treated by 2  $\mu$ M Ara-C and 10  $\mu$ g Exos-SKM1 or Exos -miR92a1/2 for 48 h.

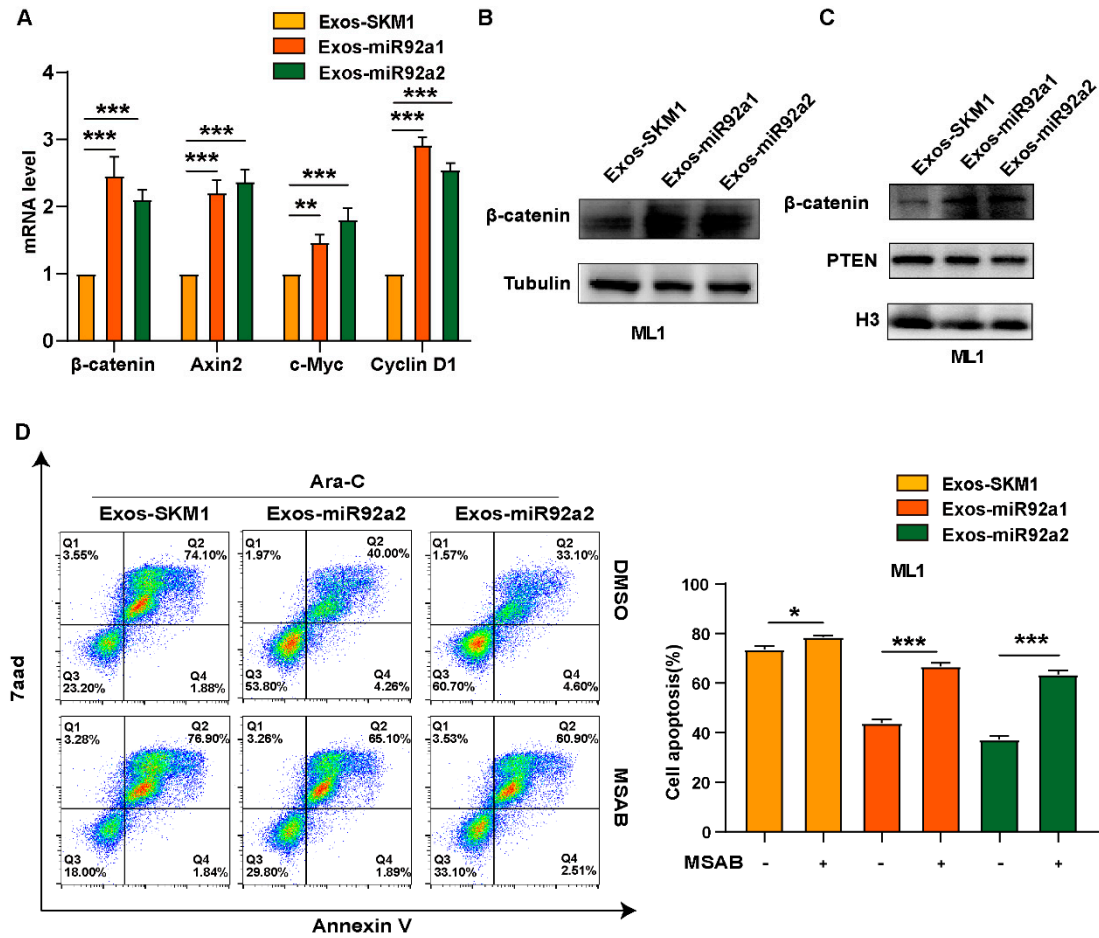

**Figure S3.** miR92a regulates ML1 cell growth via activating Wnt/β-catenin signal. (A) Expression of β-catenin, Axin2, c-Myc and Cyclin D1 in Exos-SKM1, Exos-miR92a1, Exos-miR92a2 treated ML1 cells analyzed by qRT-PCR. (B) Expression of β-catenin in ML1 treated with Exos-SKM1, Exos-miR92a1, Exos-miR92a2 by Western Blotting. (C) PTEN and β-catenin in the nucleus of ML1 treated with Exos-SKM1, Exos-miR92a1, Exos-miR92a2. (D) Apoptosis of Exos-SKM1, Exos-miR92a1 or Exos-miR92a2 treated ML1 under 2.5 μM MSAB and 2 μM Ara-C treatment for 48 h respectively.

**Table S1.** Patient list.

| diagnosis    | age (yr) | gender | miR92a | WBC (*10 <sup>9</sup> /L) | PLT (*10 <sup>9</sup> /L) | IPSS  |
|--------------|----------|--------|--------|---------------------------|---------------------------|-------|
| AML          | 63       | M      | high   | 171.09                    | 69                        | 2     |
| AML from MDS | 16       | M      | high   | 27.12                     | 4                         | 1.5   |
| MDS          | 56       | M      | high   | 6.07                      | 122                       | 0     |
| AML          | 53       | M      | high   | 21.1                      | 62                        | 0.5   |
| MDS          | 66       | F      | high   | 11.11                     | 8                         | 1     |
| AML          | 55       | F      | high   | 14.27                     | 25                        | 1.5   |
| MDS          | 77       | M      | high   | 2.46                      | 32                        | 2     |
| MDS          | 62       | F      | high   | 3.22                      | 5                         | 1.5   |
| AML          | 47       | F      | high   | 123                       | 5                         | > 2.5 |
| AML          | 83       | M      | high   | 28.1                      | 62                        | 1     |
| MDS          | 71       | F      | low    | 7.22                      | 653                       | 1.5   |
| AML          | 66       | M      | low    | 23.66                     | 30                        | 1     |
| AML          | 64       | F      | low    | 68.34                     | 30                        | 0     |
| AML          | 42       | F      | low    | 66.7                      | 145                       | 1     |
| AML          | 78       | F      | low    | 3.41                      | 87                        | 1.5   |
| MDS          | 32       | F      | low    | 2.52                      | 13                        | 1     |
| MDS          | 73       | F      | low    |                           |                           | 1     |
| MDS          | 49       | F      | low    | 3.52                      | 54                        | 2     |
| MDS          | 77       | F      | low    | 2.03                      | 36                        | 1     |
| AML          | 55       | F      | low    | 99.16                     | 49                        | 0     |
| AML from MDS | 28       | M      | low    | 9.72                      | 19                        | 0     |
| HD           | 45       | F      | -      | -                         | -                         | -     |
| HD           | 35       | F      | -      | -                         | -                         | -     |
| HD           | 27       | F      | -      | -                         | -                         | -     |
| HD           | 61       | F      | -      | -                         | -                         | -     |
| HD           | 28       | F      | -      | -                         | -                         | -     |
| HD           | 31       | F      | -      | -                         | -                         | -     |

**Table S2.** Primer list.

| Primer             | Sequence (5' to 3')                                            |
|--------------------|----------------------------------------------------------------|
| miR92a1F           | GCGAGCACAGAATTAATACGAC                                         |
| miR92a1R           | GCGAGCACAGATTACTTGTGT                                          |
| miR92a2F           | TTGTCCCGGCCTGTGGAAA                                            |
| miR92a2R           | GAAGGTGAAGGTCGGAGTC                                            |
| PTEN WT F          | GTAATTCTAGGCGATCGCTGAGTTTCTGGAATATTTT                          |
| PTEN WT R          | TTTATTGCGGCCAGCTCAGTGCATAGCATT                                 |
| PTEN MUT 1 F       | GTAATTCTAGGCGATCGCTCGAGCTCCTCTTGGAACATG                        |
| PTEN MUT 1 R       | TTATGAACATAGTATAAAAAATTTCTAGGAACTAA                            |
| PTEN MUT 2 F       | GAAATTTTTATACATGTTTCATAACGATGGCT                               |
| PTEN MUT 2 R       | TTTATTGCGGCCAGCGGCCGCTTTAGTATATATATATTCTA<br>TATGAAACAGGTTGAAC |
| U6 F               | CAGCACATATACTAAAATTGGAACG                                      |
| U6 R               | ACGAATTTGCGTGTTCATCC                                           |
| miR92a             | TATTGCACTTGTCCCGGCCTGT                                         |
| GAPDH F            | GAAGGTGAAGGTCGGAGTC                                            |
| GAPDH R            | GAAGATGGTGATGGGATTTC                                           |
| $\beta$ -catenin F | AGCCGACACCAAGAAGCA                                             |
| $\beta$ -catenin R | GGCCACCCATCTCATGTTC                                            |
| SMAD4 F            | CACTATGAGCGGGTTGTC                                             |
| SMAD4 R            | GGTGCTGGTGGCGTTA                                               |
| ZEB2 F             | CAAGAGGCGCAAACAAGCC                                            |
| ZEB2 R             | GGTTGGCAATACCGTCATCC                                           |
| KLF4 F             | CAAGTCCCGCCGCTCCATTACCAA                                       |
| KLF4 R             | CCACAGCCGTCCCAGTCACAGTGG                                       |
| FGF2 F             | TGCTGGCTTCTGTGAGTAGTG                                          |
| FGF2 R             | GCCCAGTTCGTTTCAGTGCCA                                          |
| PTEN F             | TCCCAGACATGACAGCCATC                                           |
| PTEN R             | TGCTTTGAATCCAAAAACCTTACT                                       |
| Axin 2 F           | ACTGCCCACACGATAAGGAG                                           |
| Axin 2 R           | CTGGCTATGTCTTTGGACCA                                           |
| c-Myc F            | GCTGCTTAGACGCTGGATTT                                           |
| c-Myc R            | CACCGAGTCGTAGTCGAGGT                                           |
| cyclin D1 F        | CCATCCAGTGGAGGTTTGTC                                           |
| cyclin D1 R        | AGCGTATCGTAGGAGTGGGA                                           |
